1 **Title:** Stereological characterization of neurogenic niche secretory cell types in the mouse  
2 dorsal dentate gyrus

3 **Authors:** Joshua D. Rieskamp<sup>1,2</sup>, Patricia Sarchet<sup>2</sup>, Bryon M. Smith<sup>2</sup>, Elizabeth D. Kirby<sup>2,3,4,\*</sup>

4 <sup>1</sup>Neuroscience Graduate Program, <sup>2</sup>Department of Psychology, <sup>3</sup>Department of Neuroscience,

5 <sup>4</sup>Chronic Brain Injury Program, The Ohio State University, Columbus, OH

6 \*Corresponding Author, kirby.224@osu.edu

## 7 **Abstract**

8 Adult neurogenesis in the dorsal dentate gyrus (DG) subregion of the mammalian hippocampus  
9 supports critical cognitive processes related to memory. Local DG cell populations form a  
10 neurogenic niche specialized to regulate adult neurogenesis. Recently, DG astrocytes,  
11 microglia, endothelia, and neural stem cells have been identified as sources of neurogenesis-  
12 modulating secreted factors. Accurately estimating the size of these cell populations is useful  
13 for elucidating their relative contributions to niche physiology. Previous studies have  
14 characterized these cell types individually, but to our knowledge no comprehensive study of all  
15 these cell types exists. This is problematic because considerable variability in reported  
16 population size complicates comparisons across studies. Here, we apply consistent  
17 stereological methods within a single study to estimate cell density for neurogenesis-modulating  
18 secretory cell types in the dorsal DG of adult mice. We used immunohistochemical phenotypic  
19 markers to quantify cell density and found that stellate astrocytes were the most numerous  
20 followed by endothelia, intermediate progenitors, microglia, and neural stem cells. We did not  
21 observe any significant sex differences in cell density. We expect our data will facilitate efforts to  
22 elucidate the role of DG secretory cell populations in regulating adult neurogenesis.

## 23 **Introduction**

24 The mammalian hippocampus is well studied for its role in episodic memory, spatial navigation,  
25 and mood regulation (1). Within the hippocampal circuit, the dorsal dentate gyrus (DG)  
26 subregion mediates crucial computational processes related to memory, such as pattern  
27 separation (2,3). These proposed functional roles likely relate to the distinct neuroanatomical  
28 features of the DG, including its organization along the longitudinal (dorsal-ventral or septal-  
29 temporal) axis (1).

30 The DG is unique from most adult brain circuits because it hosts a specialized niche where  
31 neural stem cells (NSCs) continuously generate granule neurons throughout life. Adult  
32 hippocampal neurogenesis (AHN) occurs in most mammals, possibly including humans (4–7).  
33 Rodent studies implicate new granule neurons generated via adult neurogenesis in several key  
34 cognitive tasks carried out by the DG (8). Furthermore, experimental manipulations that mitigate  
35 age-related declines in neurogenesis improve cognitive performance (9,10), raising the  
36 possibility that targeting neurogenesis could be therapeutically useful. Therefore, developing a  
37 comprehensive picture of the factors that regulate adult hippocampal neurogenesis is a topic of  
38 intense investigation.

39 AHN relies on external regulation from the niche microenvironment. Recent studies demonstrate  
40 that secreted factors modulate key facets of neurogenesis such as NSC proliferation dynamics  
41 and adult-born neuron survival/maturation (11). These secreted factors originate from multiple  
42 niche-resident cell types including vascular endothelia cells, astrocytes, microglia, and even  
43 undifferentiated NSCs (12–16).

44 As these multiple cell types contribute to the neurogenesis-modulating secretome, it is useful to  
45 know their relative numbers. However, these cell types have not been subjected to the same  
46 level of stereological characterization as other DG populations like mature and immature  
47 granule neurons. Furthermore, most stereological studies examine a select few cell types, and  
48 while efforts have been made to generate comprehensive atlases (17), these databases

49 currently lack information about essential DG secretory cell types such as NSCs and vascular  
50 endothelial cells. Therefore, one must combine multiple sources to obtain a comprehensive  
51 estimate of DG secretory cell composition. This approach is problematic because numbers vary  
52 substantially across studies, even for commonly quantified cell types (18), leading to  
53 considerably different conclusions depending on which data is used to draw comparisons.

54 To circumvent this issue, here we apply consistent stereological methods within the same study  
55 to estimate the relative numerical densities of NSCs, astrocytes, microglia, and vascular  
56 endothelial cells in the DG. To our knowledge, this represents the first effort to quantify these  
57 AHN-modulating secretory cell types within a single study.

## 58 **Results**

59 We used immunohistochemistry to identify cells expressing phenotypic markers of  
60 neurogenesis-modulating secretory cell populations within the DG: NSCs and their intermediate  
61 progenitor cell progeny (IPCs), mature stellate astrocytes, microglia, and vascular endothelial  
62 cells. Cell density estimates were derived for adult wildtype C57BL/6 mice using the optical  
63 fractionator method to count cells within a region of interest (ROI) encompassing all layers of  
64 the DG (molecular, granular, and hilar) at the dorsal (septal/rostral) pole of the dorsal-ventral  
65 axis (Figure 1A-B).

66

67 **FIGURE 1 | Representative immunolabeling of neural stem and progenitor cell, astroglial,**  
68 **microglial, endothelial, and proliferative cell markers in the dorsal dentate gyrus (DG). (A-**  
69 **B) The ROI used for cell counts encompassed all layers of the DG and spanned the septal**  
70 **(dorsal) pole of the septal-temporal axis. (C-E) Representative SOX2 and GFAP**  
71 **immunolabeling. Mature astrocytes had SOX2+ nuclei, GFAP+ cytoplasm, and stellate**  
72 **morphology (E, top, asterisk). Radial glia like neural stem cells had SOX2+ nuclei in the SGZ,**

73 GFAP+ cytoplasm, and a radial process spanning the GCL (**E, bottom, arrows**). Neural  
74 intermediate progenitors had SOX2+ nuclei in the SGZ lacking GFAP+ cytoplasm (**E, bottom,**  
75 **chevrons**). (**F-H**) MCM2 immunolabeling and (**I-K**) BrdU immunolabeling 2 hours post injection  
76 to reveal actively cycling cells. (**L-N**) Representative Iba1 immunolabeling for microglia. (**O-Q**)  
77 CD31 immunolabeling to detect vascular endothelial cells. Scale bars represent 100  $\mu\text{m}$  (**A, C,**  
78 **F, I, L, O**), 20  $\mu\text{m}$  (**D, G, J, M, P**), or 10  $\mu\text{m}$  (**E, H, K, N, Q**).

79

### 80 *NSCs and astrocytes*

81 Many of the protein markers expressed by adult NSCs are also present in mature astrocytes  
82 (19). Therefore, we distinguished these cell populations based on a combination of SOX2 and  
83 GFAP immunolabeling along with cell morphology (20). We identified radial glial-like neural  
84 stem cells (RGLs) as having SOX2+ nuclei located in the subgranular zone (SGZ) and GFAP+  
85 cytoplasm with a radial process extending into the granule cell layer (Figure 1D-E). The progeny  
86 of RGLs, neural intermediate progenitor cells (IPCs), were identified as SOX2+ nuclei located in  
87 the SGZ that lacked GFAP+ cytoplasm (Figure 1D-E). Mature protoplasmic astrocytes had  
88 SOX2+ nuclei located in any region of the DG and GFAP+ cytoplasm with stellate processes  
89 (Figure 1D-E). We found that mature astrocytes were the most abundant of these three  
90 populations ( $8274.7 \pm 1109.7$ ,  $9232.4 \pm 1095.1$  cells/mm<sup>3</sup>, females and males, respectively)  
91 followed by IPCs ( $4532.2 \pm 469.7$ ,  $5220.1 \pm 820.2$  cells/mm<sup>3</sup>), then RGLs ( $1364.9 \pm 132.0$ ,  
92  $1228.6 \pm 59.5$  cells/mm<sup>3</sup>, Figure 2A). Males and females did not significantly differ in number of  
93 astrocytes ( $p > 0.05$ ,  $t = 0.61$ ), RGLs ( $p > 0.05$ ,  $t = 1.02$ ), or IPCs ( $p > 0.05$ ,  $t = 0.68$ ).

### 94 *Mitotically active cells*

95 To expand the quantification of progenitor cells, we used two markers of cellular mitosis. The  
96 adult DG contains various populations of mitotically active cells, which can be identified using

97 endogenous cell cycle markers such as MCM2 or the exogenous S phase maker  
98 bromodeoxyuridine (BrdU) (21,22). Previous studies have shown that the majority of MCM2+ or  
99 recently BrdU-labeled cells in the DG are IPCs located within the SGZ, with a sparser number of  
100 proliferative glial cells located outside the SGZ (23,24). Consistent with these previous findings,  
101 we found MCM2+ cells throughout the entire DG, but the greatest density was found within the  
102 SGZ (Figure 1F-H). To obtain counts most directly related to IPC number, only MCM2+ cells in  
103 the SGZ were quantified. The density of SGZ MCM2+ cells did not significantly differ between  
104 females and males ( $4324.1 \pm 1106.9$  vs  $3740.7 \pm 356.8$  cells/mm<sup>3</sup>,  $p>0.05$ ,  $t=0.55$ ) (Figure 2A).  
105 We obtained similar results quantifying BrdU+ cells after a single BrdU injection administered 2  
106 hours before perfusion. BrdU labeled cells were found throughout the entire extent of the DG,  
107 but most commonly within the SGZ (Figure 1I-K). To obtain counts most directly related to the  
108 number of IPCs in S-phase, only BrdU+ cells in the SGZ were quantified. The density of SGZ  
109 BrdU+ cells was not different between females and males ( $658.4 \pm 61.9$  vs  $597.3 \pm 162.1$   
110 cells/mm<sup>3</sup>,  $p>0.05$ ,  $t=0.32$ ) and represented a smaller subset of cells than all cycling (i.e.  
111 MCM2+) cells, as expected (Figure 2A).

112

113 **FIGURE 2 | Stereological estimates of all cell types surveyed in the current study.** Data  
114 are represented as cell density (A) and number of cells in a 40  $\mu$ m slice (B). (C) Cell density  
115 estimates of mutually exclusive cell type categories (for example, MCM2+ cells might overlap  
116 with multiple other cell types and is thus not included). Data is mean  $\pm$  SEM from male (n=5)  
117 and female (n=4) adult mice. No significant sex difference for any cell type was detected via  
118 unpaired, two-tailed t-test ( $p>0.05$ ).

119

120 *Microglia*

121 Iba1+ microglia were distributed throughout every region of the DG (Figure 1L-N) and were  
122 similar in number to RGLs. No sex difference was found in Iba1+ cell density ( $2677.1 \pm 892.1$  vs  
123  $1816.8 \pm 210.2$  cells/mm<sup>3</sup>,  $p > 0.05$ ,  $t = 1.05$ , Figure 2A).

#### 124 *Vascular endothelial cells*

125 Vascular endothelial cells within the DG were identified by CD31 immunolabeling and formed  
126 vascular networks throughout all subregions (Figure 1O-Q). The density of CD31+ cells was  
127 intermediate between the density of astrocytes and IPCs, with no sex difference ( $6768.7 \pm$   
128  $1067.3$  vs  $5849.0 \pm 639.4$  cells/mm<sup>3</sup>,  $p > 0.05$ ,  $t = 0.78$ , Figure 2A).

#### 129 *Summary*

130 Cell density estimates for each cell marker quantified in the current study are depicted in Figure  
131 2A. To facilitate comparisons with counts performed in sections cut to a commonly used  
132 thickness for free-floating immunohistochemistry, data is also presented as estimates of cell  
133 number in a 40  $\mu$ m slice (Figure 2B). In addition, we provide an estimate of relative population  
134 sizes for the major cell types quantified using mutually exclusive markers for RGLs, IPCs,  
135 astrocytes, microglia, and endothelial cells (Figure 2C). This presentation of the data allows an  
136 appreciation of the approximate relative population sizes of the major DG secretory cell types  
137 surveyed in this study.

#### 138 **Discussion**

139 Adult hippocampal neurogenesis in rodents occurs within the DG, a niche comprised of  
140 neurogenesis-supporting cells. So far, studies have identified several cell types – astrocytes,  
141 microglia, endothelial cells, and neural stem cells – which regulate neurogenesis via secreted  
142 factors (12–16). Here, we quantified these cell types using stereology to obtain an estimate of  
143 the relative population densities of neurogenesis-modulating secretory cells within the dorsal  
144 DG.

145 We found that GFAP+SOX2+ stellate astrocytes were the largest cell population in our study,  
146 followed closely by CD31+ vascular endothelial cells. Next most abundant were GFAP-SOX2+  
147 IPCs, Iba1+ microglia, and GFAP+SOX2+ RGLs. Notably, we compared densities obtained  
148 from both male and female mice for each cell type and found no significant sex differences.  
149 While a previous study reports sex differences in DG astrocyte and microglia density (Mouton et  
150 al., 2002), quantification for males and females were obtained from separate rounds of tissue  
151 processing and counting. Though the authors made efforts to maintain consistent methodology,  
152 small but systematic differences between cohorts could influence the results. In our study,  
153 where both sexes were processed and counted in a single cohort, we did not observe sex  
154 differences in astrocytes, microglia, or any other cell type surveyed. To our knowledge, this is  
155 the first study to quantify this set of cell types in the DG of both sexes by applying the same  
156 methodology to a single cohort of mice.

157 Previous studies have estimated population size for each of the DG cell types studied here  
158 individually. However, comparison of our data with previous work is complicated by the  
159 variability in population estimates across studies (18). For example, estimates of astrocyte  
160 density in the DG range from 19,900 cells/mm<sup>3</sup> (25) to 55,700 cells/mm<sup>3</sup> (26). Despite these  
161 studies using unbiased stereology, variability could arise for biological (different cohorts of  
162 mice), methodological (different markers and anatomical boundaries), and computational  
163 (different extrapolation from sampled counts to total population density estimates) reasons.  
164 Even small differences in sampling parameters and adjustments for tissue shrinkage become  
165 amplified when calculating estimates of total population size and tissue volume (18). How the  
166 data derived from differing methods can be adjusted for comparison is not immediately clear.  
167 This variability combined with the tendency of most studies to examine a select few cell types  
168 complicates attempts to compare cell population sizes across studies.

169 To circumvent these issues, we sought to use consistent methodology to obtain estimates for a  
170 comprehensive set of DG cell types previously implicated in modulating neurogenesis via  
171 secreted factors. All data in this study were generated using tissue from a single cohort of male  
172 and female mice of the C57BL/6 strain, one of the most commonly used rodent species in  
173 biosciences research (27). Therefore, the main advantage of this dataset is the validity of  
174 internal comparisons between various cell types in a common research model species. For  
175 example, when drawing comparisons based on data reported in separate studies, the microglia  
176 to astrocyte ratio could range from approximately 1:1 (25,26) to 1:6 (28,29). By comparison,  
177 using our estimates, we report a microglia to astrocyte ratio of roughly 1:4, similar to the  
178 approximately 1:3 ratio reported by others when both cell types were quantified within the same  
179 study (26,29). This test case highlights the utility of counts obtained within a single study for  
180 making accurate comparisons of relative population sizes.

181 Important limitations to this dataset should be noted. Counts were performed exclusively in the  
182 dorsal (rostral/septal) DG with no separate delineation of the layers (i.e. molecular, granular,  
183 hilar) or inclusion of ventral DG populations. We chose to focus on dorsal DG because it  
184 represents a functional unit with known roles in mediating memory functions related to pattern  
185 separation and temporal encoding (3). While the degree to which the DG dorsal-ventral axis  
186 constitutes discrete brain regions versus overlapping functional gradients is a matter of debate  
187 (1), distinct gene expression, connectivity, and behavioral correlates at the dorsal and ventral  
188 poles (30) provide justification for separate analysis. Given reports of disparate cell densities  
189 along the DG longitudinal axis (31), future studies should quantify the major secretory cell  
190 populations of ventral DG. Additionally, similar comprehensive analysis of neurogenesis-  
191 modulating cell types in the subventricular zone and hypothalamus could elucidate region-  
192 specific mechanisms for regulating adult neurogenesis.



193 Overall, we have provided stereological density estimates for neurogenesis-modulating  
194 secretory cell types of the dorsal DG. Our data facilitates direct comparisons of multiple cell  
195 types, which we expect will be useful for refining hypotheses about the relative contributions of  
196 these cell types to regulating adult neurogenesis.

## 197 **Methods**

### 198 *Animals*

199 All animal use was in accordance with institutional guidelines approved by the Ohio State  
200 University Institutional Animal Care and Use Committee and with recommendations of the  
201 National Institutes of Health Guide for the Care and Use of Laboratory Animals. C57BL/6 mice  
202 (5 male, 4 female) were acquired from Jackson Laboratories at 7 weeks of age and housed in a  
203 vivarium at Ohio State University with 24h ad libitum water and standard mouse chow on a 12h  
204 light-dark cycle for 1 week. Mice received one injection of 150 mg/kg bromodeoxyuridine  
205 (Sigma) dissolved in physiological saline, and 2h later were anesthetized with 87.5 mg/kg  
206 ketamine/12.5 mg/kg xylazine and transcardially perfused with 0.1 M phosphate buffered saline  
207 (PBS).

### 208 *Tissue processing*

209 Brains were fixed for 24h in 4% paraformaldehyde in 0.1 M phosphate buffer then equilibrated  
210 for at least 2 days in 30% sucrose in PBS, both at +4°C. They were then sliced on a freezing  
211 microtome (Leica) in a 1 in 12 series of 40 µm slices. Slices were stored in cryoprotectant at  
212 -20°C. Immunohistochemical staining was performed on free-floating sections as previously  
213 described (32). Briefly, sections were rinsed three times in PBS, incubated in blocking solution  
214 (1% normal donkey serum, 0.3% triton-X 100 in PBS) for 30 min then incubated in primary  
215 antibody diluted in blocking buffer overnight at 4°C on rotation. The next day, sections were  
216 rinsed and incubated in secondary antibody in blocking solution at room temperature for 2

217 hours, followed by 10 min in Hoechst 33342 (Invitrogen) diluted 1:2000 in PBS. After rinsing,  
218 sections were mounted on superfrost plus glass slides (Fisher) and cover-slipped with Prolong  
219 Gold Anti-fade medium (Invitrogen). After drying, slides were stored in the dark at 4°C until  
220 imaging. For BrdU immunohistochemical labeling, the above procedures were followed with the  
221 addition of a 30 min incubation in 2N HCl at 37°C to denature DNA before the blocking step.

## 222 *Stereological cell counts*

223 Stereological cell counts were performed in a single series of every 12th slice for each cell  
224 phenotype marker. Images of the dorsal DG were captured using Zeiss Axiolmager.M2  
225 microscope and a Zeiss MRc digital camera. Cells were counted at 40x magnification with oil  
226 immersion using the optical fractionator method (Stereoinvestigator). The counting frame had  
227 an area of 10,000  $\mu\text{m}^2$  and a height of 15  $\mu\text{m}$  with 5  $\mu\text{m}$  guard zones. Proliferating cells were  
228 identified using the nuclear markers in **Table 1**. Endothelial cells and microglia were identified  
229 by the cytoplasmic markers in **Table 1** surrounding a Hoechst+ nucleus. Radial glia-like neural  
230 stem cells (RGLs) were identified as SOX2+ nuclei in the SGZ surrounded by GFAP+ cytoplasm  
231 with an apical process extending into the granular cell layer. Neural intermediate progenitor cells  
232 (IPCs) were identified as SOX2+ nuclei in the SGZ lacking cytoplasmic GFAP. Astrocytes were  
233 identified as SOX2+ cells with GFAP+ stellate processes located in any DG subregion. The  
234 mean number of cells counted for each marker are listed in **Table 2**.

235

| Primary antibodies |              |                     |                   |             |           |          |             |
|--------------------|--------------|---------------------|-------------------|-------------|-----------|----------|-------------|
| Antibody           | Host species | Cell type           | Antigen retrieval | Vendor      | Product # | Dilution | Ref/control |
| $\alpha$ Sox2      | rat          | RGL, IPC, astrocyte | None              | eBioscience | 14-9811   | 1:1000   | (33)        |
| $\alpha$ GFAP      | rabbit       | RGL, astrocyte      | None              | Dako        | Z-0334    | 1:1000   | (34)        |

|               |        |                     |              |                |            |        |                   |
|---------------|--------|---------------------|--------------|----------------|------------|--------|-------------------|
| $\alpha$ MCM2 | rabbit | Proliferating cells | None         | Cell Signaling | 4007       | 1:500  | (35)              |
| $\alpha$ BrdU | mouse  | Proliferating cells | 2N HCl, 37°C | BD Biosciences | BDB 347580 | 1:500  | No BrdU injection |
| $\alpha$ Iba1 | goat   | Microglia           | None         | Abcam          | Ab5076     | 1:2000 | (32)              |
| $\alpha$ CD31 | rat    | Endothelia          | None         | BD Pharmingen  | 550274     | 1:100  | (36)              |

**Secondary antibodies**

|                     |        |            |     |            |       |        |            |
|---------------------|--------|------------|-----|------------|-------|--------|------------|
| 647 $\alpha$ rabbit | donkey | GFAP, MCM2 | N/A | Invitrogen | 1:500 | A31573 | No primary |
| 594 $\alpha$ rat    | donkey | Sox2, CD31 | N/A | Invitrogen | 1:500 | A21209 | No primary |
| 488 $\alpha$ mouse  | donkey | BrdU       | N/A | Invitrogen | 1:500 | A21202 | No primary |
| 488 $\alpha$ goat   | donkey | Iba1       | N/A | Invitrogen | 1:500 | A11055 | No primary |

236

237 **Table 1 | Antibodies used for immunohistochemical identification of cell phenotype.** All  
 238 antibodies were validated in previous work or compared to an appropriate control to ensure  
 239 specificity of immunolabeling.

240

| Cell type marker | Total Cells Counted (Mean $\pm$ SEM) | Distribution (% of all counted cells, mean $\pm$ SEM) |                  | Gundersen-Jensen CE $m = 0$ | Gundersen-Jensen CE $m = 1$ |
|------------------|--------------------------------------|-------------------------------------------------------|------------------|-----------------------------|-----------------------------|
|                  |                                      | Top 5 $\mu$ m                                         | Middle 5 $\mu$ m |                             |                             |
|                  |                                      | GFAP+SOX2+stel                                        | 308.1 $\pm$ 7.5  |                             |                             |
| GFAP+SOX2+rad    | 46.4 $\pm$ 4.1                       | 34.44 $\pm$ 1.75                                      | 33.48 $\pm$ 2.37 | 0.203                       | 0.154                       |
| GFAP-SOX2+       | 148.3 $\pm$ 8.2                      | 30.07 $\pm$ 2.17                                      | 36.06 $\pm$ 1.83 | 0.164                       | 0.088                       |
| MCM2             | 140.1 $\pm$ 10.5                     | 38.47 $\pm$ 3.69                                      | 33.63 $\pm$ 2.52 | 0.188                       | 0.094                       |

|      |             |              |              |       |       |
|------|-------------|--------------|--------------|-------|-------|
| BrdU | 22.7 ± 2.7  | 37.25 ± 5.32 | 20.58 ± 5.46 | 0.287 | 0.243 |
| Iba1 | 74.3 ± 6.6  | 35.49 ± 0.76 | 34.75 ± 1.76 | 0.164 | 0.120 |
| CD31 | 175.1 ± 7.7 | 30.21 ± 1.15 | 39.07 ± 1.97 | 0.161 | 0.083 |

---

| Immunostaining Round | Measured Tissue Thickness (mean ± SEM) |             | Sections surveyed | Sites surveyed (mean ± SEM) |
|----------------------|----------------------------------------|-------------|-------------------|-----------------------------|
|                      | Males                                  | Females     |                   |                             |
| GFAP, SOX2, BrdU     | 25.3 ± 0.09                            | 26.6 ± 1.33 | 3                 | 56.8 ± 1.3                  |
| CD31                 | 25.9 ± 0.80                            | 24.8 ± 0.75 | 3                 | 60.6 ± 1.3                  |
| MCM2, Iba1           | 26.3 ± 0.69                            | 25.5 ± 0.86 | 3                 | 59.7 ± 1.5                  |

241

242 **Table 2 | Total counts, distribution, error estimators, measured tissue thickness, and**  
 243 **number of sections sampled for all cell types surveyed in the current study.** For each cell  
 244 type, the total cells counted and percentage of cells counted in the middle 5 consecutive 1 μm z-  
 245 sections and top 5 consecutive 1 μm z-sections immediately below the guard zone are listed  
 246 (mean ± SEM). Error estimators are listed as Gundersen coefficients (with smoothness  $m = 0$   
 247 or  $m = 1$  ). For each round of immunostaining, the measured thickness (mean ± SEM) and  
 248 number of sections samples is provided. Thickness was manually measured in 3 locations per  
 249 slice to adjust for shrinkage relative to the 40 μm starting thickness.

250

### 251 *Data analysis and statistics*

252 Cell density was calculated from cell count divided by sampled DG tissue volume. Because  
 253 immunohistochemical processing causes tissue shrinkage, sampled tissue volume was  
 254 estimated using sampled area adjusted by the proportional change in measured post-

255 processing tissue thickness (i.e. thickness measured in 3 locations per slice using  
256 Stereoinvestigator versus the sliced thickness of 40  $\mu\text{m}$ ). Mean thickness measurements  
257 obtained for each round of immunostaining are reported in **Table 2**. For each cell type, cell  
258 densities in males and females were compared using an unpaired, two-tailed t-test (Prism  
259 GraphPad).

#### 260 *Cell distribution*

261 Incomplete antibody penetration can interfere with obtaining accurate stereological estimates.  
262 We verified complete antibody penetration by comparing the number of cells for each marker  
263 counted in 5 consecutive 1  $\mu\text{m}$  z-sections in the middle of the tissue compared to the 5  
264 consecutive 1  $\mu\text{m}$  z-sections immediately below the guard zone (top). We observed similar  
265 counts obtained from the middle z-sections compared to the top, suggesting uniform antibody  
266 penetration (**Table 2**).

#### 267 *Error estimates*

268 Previous work suggests that the Gundersen-Jensen coefficient of error (CE) estimator (37) is  
269 useful for evaluating the precision of stereological estimates in the hippocampal structure (38).  
270 The mean Gundersen-Jensen CE for each cell type is reported in **Table 2**.

#### 271 **Conflict of Interest**

272 The authors declare that the research was conducted in the absence of any commercial or  
273 financial relationships that could be construed as a potential conflict of interest.

#### 274 **Author Contributions**

275 PS and BMS processed and stained the tissue. EDK performed the stereological counts. JDR  
276 and EDK performed statistical analysis. JDR and EDK wrote the manuscript.

#### 277 **Funding**

278 This work was funded by R00NS089938 to EDK.

## 279 **Acknowledgements**

280 The authors would like to thank Dr. Kathryn Lenz for use of equipment.

## 281 **References**

- 282 1. Strange BA, Witter MP, Lein ES, Moser EI. Functional organization of the hippocampal  
283 longitudinal axis. *Nat Rev Neurosci*. 2014 Oct;15(10):655–69.
- 284 2. Knierim JJ, Neunuebel JP. Tracking the flow of hippocampal computation: Pattern  
285 separation, pattern completion, and attractor dynamics. *Pattern Sep Pattern Complet*  
286 *Hippocampal Syst*. 2016 Mar 1;129:38–49.
- 287 3. Yassa MA, Stark CEL. Pattern separation in the hippocampus. *Trends Neurosci*. 2011 Oct  
288 1;34(10):515–25.
- 289 4. Boldrini M, Fulmore CA, Tartt AN, Simeon LR, Pavlova I, Poposka V, et al. Human  
290 Hippocampal Neurogenesis Persists throughout Aging. *Cell Stem Cell*. 2018 Apr  
291 5;22(4):589-599.e5.
- 292 5. Gonçalves JT, Schafer ST, Gage FH. Adult Neurogenesis in the Hippocampus: From Stem  
293 Cells to Behavior. *Cell*. 2016;167(4):897–914.
- 294 6. Moreno-Jiménez EP, Flor-García M, Terreros-Roncal J, Rábano A, Cafini F, Pallas-  
295 Bazarra N, et al. Adult hippocampal neurogenesis is abundant in neurologically healthy  
296 subjects and drops sharply in patients with Alzheimer’s disease. *Nat Med*. 2019 Apr  
297 1;25(4):554–60.

- 298 7. Sorrells SF, Paredes MF, Cebrian-Silla A, Sandoval K, Qi D, Kelley KW, et al. Human  
299 hippocampal neurogenesis drops sharply in children to undetectable levels in adults.  
300 Nature. 2018 Mar;555(7696):377–81.
- 301 8. Miller SM, Sahay A. Functions of adult-born neurons in hippocampal memory interference  
302 and indexing. Nat Neurosci. 2019 Oct 1;22(10):1565–75.
- 303 9. Berdugo-Vega G, Arias-Gil G, López-Fernández A, Artegiani B, Wasielewska JM, Lee C-  
304 C, et al. Increasing neurogenesis refines hippocampal activity rejuvenating navigational  
305 learning strategies and contextual memory throughout life. Nat Commun. 2020 Jan  
306 9;11(1):135.
- 307 10. McAvoy KM, Scobie KN, Berger S, Russo C, Guo N, Decharatanachart P, et al.  
308 Modulating Neuronal Competition Dynamics in the Dentate Gyrus to Rejuvenate Aging  
309 Memory Circuits. Neuron. 2016 Sep 21;91(6):1356–73.
- 310 11. Bacigaluppi M, Sferruzza G, Butti E, Ottoboni L, Martino G. Endogenous neural precursor  
311 cells in health and disease. Brain Res. 2020 Mar 1;1730:146619.
- 312 12. Delgado AC, Ferrón SR, Vicente D, Porlan E, Perez-Villalba A, Trujillo CM, et al.  
313 Endothelial NT-3 Delivered by Vasculature and CSF Promotes Quiescence of  
314 Subependymal Neural Stem Cells through Nitric Oxide Induction. Neuron. 2014 Aug  
315 6;83(3):572–85.
- 316 13. Diaz-Aparicio I, Paris I, Sierra-Torre V, Plaza-Zabala A, Rodríguez-Iglesias N, Márquez-  
317 Ropero M, et al. Microglia Actively Remodel Adult Hippocampal Neurogenesis through the  
318 Phagocytosis Secretome. J Neurosci. 2020 Feb 12;40(7):1453.

- 319 14. Kirby ED, Kuwahara AA, Messer RL, Wyss-Coray T. Adult hippocampal neural stem and  
320 progenitor cells regulate the neurogenic niche by secreting VEGF. *Proc Natl Acad Sci U S*  
321 *A*. 2015 Mar 31;112(13):4128–33.
- 322 15. Sultan S, Li L, Moss J, Petrelli F, Cassé F, Gebara E, et al. Synaptic Integration of Adult-  
323 Born Hippocampal Neurons Is Locally Controlled by Astrocytes. *Neuron*. 2015 Dec  
324 2;88(5):957–72.
- 325 16. Tang C, Wang M, Wang P, Wang L, Wu Q, Guo W. Neural Stem Cells Behave as a  
326 Functional Niche for the Maturation of Newborn Neurons through the Secretion of PTN.  
327 *Neuron*. 2019 02;101(1):32-44.e6.
- 328 17. Erö C, Gewaltig M-O, Keller D, Markram H. A Cell Atlas for the Mouse Brain. *Front*  
329 *Neuroinformatics* [Internet]. 2018 [cited 2019 Oct 18];12. Available from:  
330 <https://www.frontiersin.org/articles/10.3389/fninf.2018.00084/full>
- 331 18. Keller D, Erö C, Markram H. Cell Densities in the Mouse Brain: A Systematic Review.  
332 *Front Neuroanat*. 2018;12:83.
- 333 19. Semerci F, Maletic-Savatic M. Transgenic mouse models for studying adult neurogenesis.  
334 *Front Biol*. 2016 Jun;11(3):151–67.
- 335 20. Suh H, Consiglio A, Ray J, Sawai T, D'Amour KA, Gage FH. In vivo fate analysis reveals  
336 the multipotent and self-renewal capacities of Sox2+ neural stem cells in the adult  
337 hippocampus. *Cell Stem Cell*. 2007 Nov;1(5):515–28.
- 338 21. von Bohlen und Halbach O. Immunohistological markers for proliferative events,  
339 gliogenesis, and neurogenesis within the adult hippocampus. *Cell Tissue Res*. 2011  
340 Jul;345(1):1–19.



- 341 22. Kuhn HG, Eisch AJ, Spalding K, Peterson DA. Detection and Phenotypic Characterization  
342 of Adult Neurogenesis. *Cold Spring Harb Perspect Biol.* 2016 Mar 1;8(3):a025981.
- 343 23. Bonaguidi MA, Wheeler MA, Shapiro JS, Stadel RP, Sun GJ, Ming G, et al. In Vivo Clonal  
344 Analysis Reveals Self-Renewing and Multipotent Adult Neural Stem Cell Characteristics.  
345 *Cell.* 2011 Jun 24;145(7):1142–55.
- 346 24. Mandyam CD, Harburg GC, Eisch AJ. Determination of key aspects of precursor cell  
347 proliferation, cell cycle length and kinetics in the adult mouse subgranular zone.  
348 *Neuroscience.* 2007 Apr 25;146(1):108–22.
- 349 25. Ogata K, Kosaka T. Structural and quantitative analysis of astrocytes in the mouse  
350 hippocampus. *Neuroscience.* 2002 Aug 2;113(1):221–33.
- 351 26. Long JM, Kalehua AN, Muth NJ, Calhoun ME, Jucker M, Hengemihle JM, et al.  
352 Stereological analysis of astrocyte and microglia in aging mouse hippocampus. *Neurobiol*  
353 *Aging.* 1998 Oct;19(5):497–503.
- 354 27. Bryant CD. The blessings and curses of C57BL/6 substrains in mouse genetic studies. *Ann*  
355 *N Y Acad Sci.* 2011 Dec;1245:31–3.
- 356 28. Wirenfeldt M, Dalmau I, Finsen B. Estimation of absolute microglial cell numbers in mouse  
357 fascia dentata using unbiased and efficient stereological cell counting principles. *Glia.* 2003  
358 Nov 1;44(2):129–39.
- 359 29. Mouton PR, Long JM, Lei D-L, Howard V, Jucker M, Calhoun ME, et al. Age and gender  
360 effects on microglia and astrocyte numbers in brains of mice. *Brain Res.* 2002 Nov  
361 22;956(1):30–5.

- 362 30. Fanselow MS, Dong H-W. Are the Dorsal and Ventral Hippocampus Functionally Distinct  
363 Structures? *Neuron*. 2010 Jan 14;65(1):7–19.
- 364 31. Jinno S, Kosaka T. Stereological estimation of numerical densities of glutamatergic  
365 principal neurons in the mouse hippocampus. *Hippocampus*. 2010;20(7):829–40.
- 366 32. Smith BM, Yao X, Chen KS, Kirby ED. A Larger Social Network Enhances Novel Object  
367 Location Memory and Reduces Hippocampal Microgliosis in Aged Mice. *Front Aging*  
368 *Neurosci*. 2018;10:142.
- 369 33. Andersson-Rolf A, Mustata RC, Merenda A, Kim J, Perera S, Grego T, et al. One-step  
370 generation of conditional and reversible gene knockouts. *Nat Methods*. 2017  
371 Mar;14(3):287–9.
- 372 34. Michalovicz LT, Kelly KA, Vashishtha S, Ben-Hamo R, Efroni S, Miller JV, et al. Astrocyte-  
373 specific transcriptome analysis using the ALDH1L1 bacTRAP mouse reveals novel  
374 biomarkers of astrogliosis in response to neurotoxicity. *J Neurochem*. 2019;150(4):420–40.
- 375 35. Wang X-X, Li J-T, Xie X-M, Gu Y, Si T-M, Schmidt MV, et al. Nectin-3 modulates the  
376 structural plasticity of dentate granule cells and long-term memory. *Transl Psychiatry*. 2017  
377 05;7(9):e1228.
- 378 36. Buscemi L, Price M, Bezzi P, Hirt L. Spatio-temporal overview of neuroinflammation in an  
379 experimental mouse stroke model. *Sci Rep*. 2019 Jan 24;9(1):507.
- 380 37. Gundersen HJG, Jensen EBV, Kiêu K, Nielsen J. The efficiency of systematic sampling in  
381 stereology — reconsidered. *J Microsc*. 1999 Mar 1;193(3):199–211.
- 382 38. Slomianka L, West MJ. Estimators of the precision of stereological estimates: An example  
383 based on the CA1 pyramidal cell layer of rats. *Neuroscience*. 2005 Jan 1;136(3):757–67.



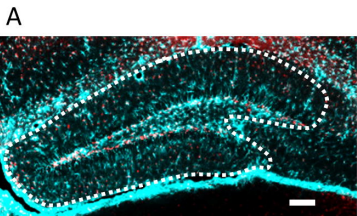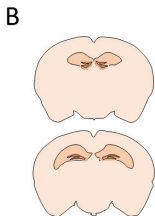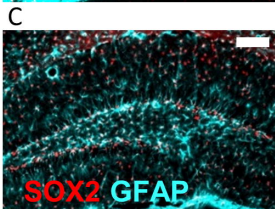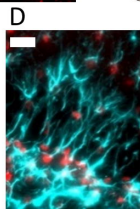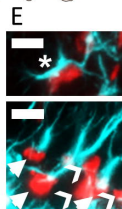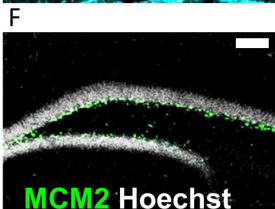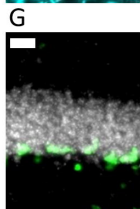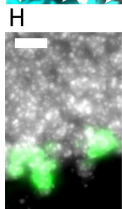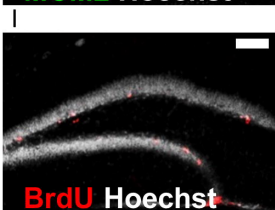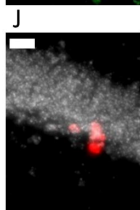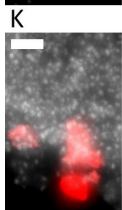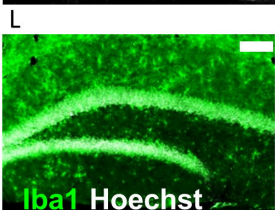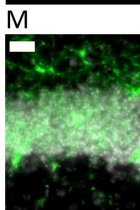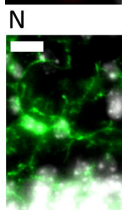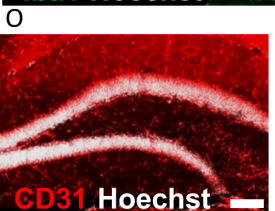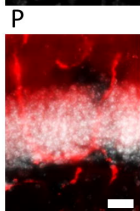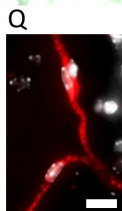

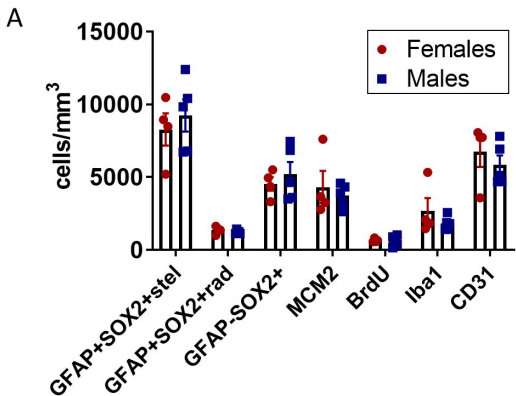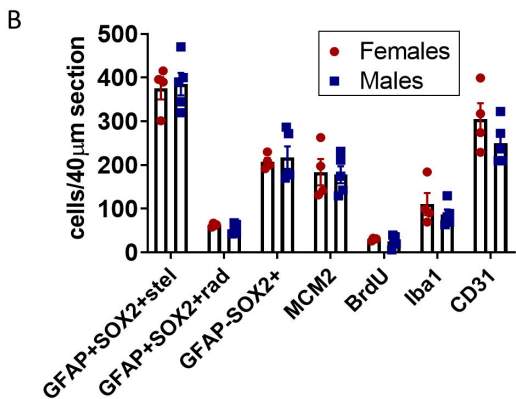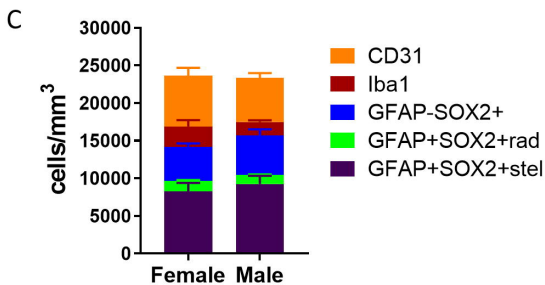

Source: https://www.biorxiv.org/content/10.1101/847350v2.full.pdf
